# Supplementary material for: Tryptophan Modulation in Cancer-Associated Cachexia Mouse Models
Source: MDPI journal article supplement (doi:10.3390/ijms241613005), 2023-08-21
Supplement: s1 [file s1]

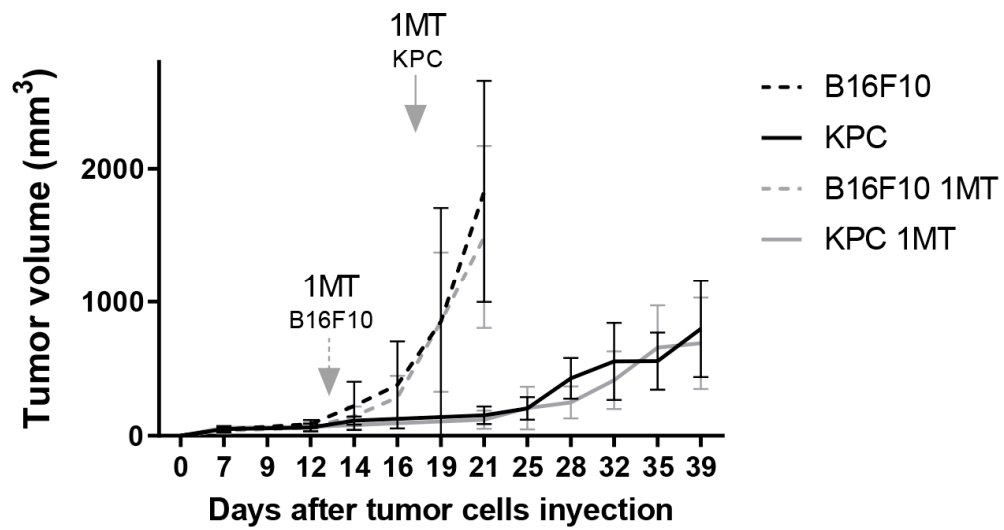

**Figure S1.** Tumor volume measured along the experiments. Tumor growth was monitored by digital calliper. Arrows indicate the time when 1-MT administration started.

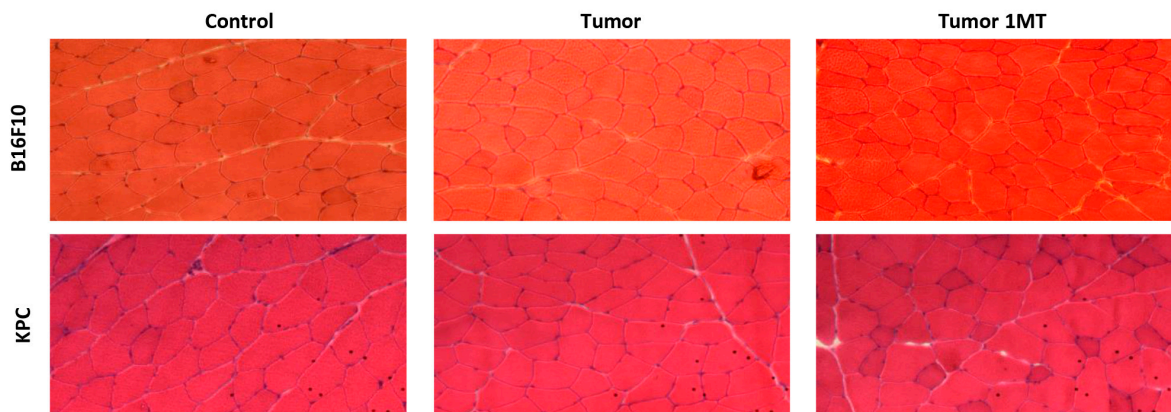

**Figure S2.** H&E staining representative of analyzed sections in our study. Frozen fresh quadriceps sections were stained using a standard H&E protocol. Representative pictures from the different conditions and models at the time of sacrifice is shown.

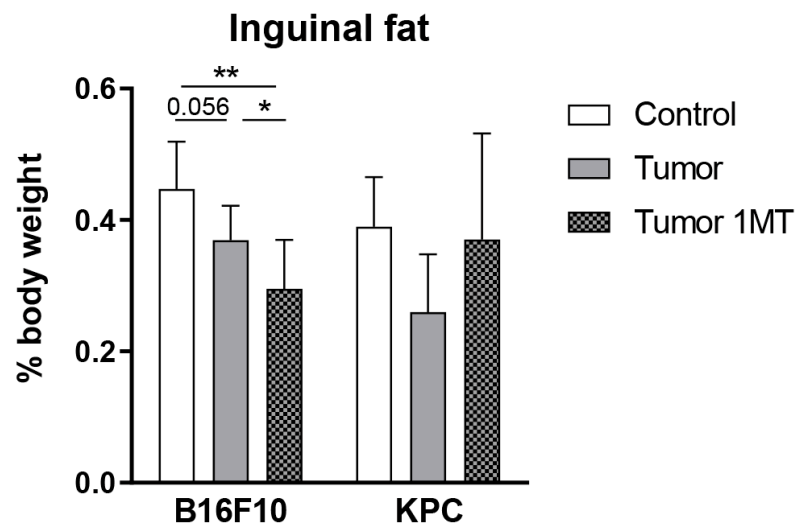

**Figure S3.** Inguinal fat weight at the time of sacrifice referred to total body weight. Significant differences between groups are indicated by \* ( $p < 0.05$ ) and \*\* ( $p < 0.005$ ).
